# Supplementary material for: A simple approach to study the conformational switching of i-motif DNA by fluorescence anisotropy
Source: Royal Society of Chemistry journal article supplement (doi:10.1039/c5an01011j), 2015-01-01
Supplement: c5an01011j1.pdf [file c5an01011j1.pdf]

## Supporting information

### A simple approach to study the conformational switching of i-motif DNA by fluorescence anisotropy

Hongduan Huang, Xinying Hong, Feng Liu and Na Li\*

Beijing National Laboratory for Molecular Sciences (BNLMS), Key Laboratory of Bioorganic Chemistry and Molecular Engineering of Ministry of Education, Institute of Analytical Chemistry, College of Chemistry and Molecular Engineering, Peking University, Beijing, 100871, China.

#### DNA sequences

---

|                    |                                          |
|--------------------|------------------------------------------|
| i-motif            | CCCTAACCCCTAACCCCTAACCCAATT              |
| ROX-i-motif cDNA   | GTTAGTGTTAGTGTTAG                        |
| 7 layer i-motif    | CCCCCCC TAA CCCCCC TAA CCCCCC TAA CCCCCC |
| 5 layer i-motif    | CCCCC TAA CCCCC TAA CCCCC TAA CCCCC      |
| 4 layer i-motif    | CCCC TAA CCCC TAA CCCC TAA CCCC          |
| 3 layer i-motif    | CCC TAA CCC TAA CCC TAA CCC              |
| 7 layer com        | GGGGGGGTTAGGGGGGGTTAGGGGGGGTTAGGGGGGG    |
| 7 layer 4mis       | GGGTGGGTTAGGGTGGGTTAGGGTGGGTTAGGGTGGG    |
| 7 layer 8mis       | GGTGTGGTTAGGTGTGGTTAGGTGTGGTTAGGTGTGG    |
| 7 layer short com  | GGGGGGGTTAGGGGGGGTTAGGGGGGGTTAGG         |
| 7 layer short 2mis | GGGGGGGTTAGGGTGGGTTAGGGTGGGTTAGG         |
| 7 layer short 4mis | GGTGTGGTTAGGGGGGGTTAGGTGTGGTTAGG         |
| 7 layer short 6mis | GGTGTGGTTAGGTGTGGTTAGGTGTGGTTAGG         |
| 7 layer short 8mis | GGTGTGGTTAGTGTGTGTTAGTGTGTGTTAGG         |
| 5 layer short com  | GGTTAGGGGGTTAGGGGGTTA                    |
| 5 layer short 2mis | GGTTAGGTGGTTAGGTGGTTA                    |
| 5 layer short 3mis | GTTTAGGTGGTTAGGTGGTTA                    |

---

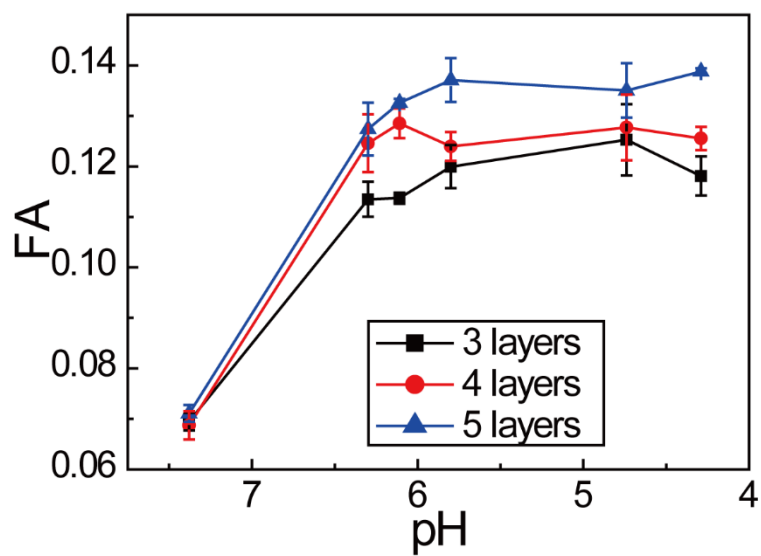

Figure S1 The fluorescence anisotropy response to the change of pH for i-motif structures formed by ROX-labeled DNA sequences.
